# Supplementary material
Source: Springer Nature journal article supplement (https://www.springermedizin.de/resource/supplementary/12889_2012_4082_MOESM3_ESM.pdf/9491272)
Supplement: MOESM3 [file 9491272]

**Table 3: Effect of selected socio-demographic, clinical and other characteristics on adherence to antihypertensive treatment, GUH, Northwest Ethiopia, 2011.**

| Variables            | Adherence Status         |              | COR(95%CI) | AOR(95%CI)         |                            |
|----------------------|--------------------------|--------------|------------|--------------------|----------------------------|
|                      | Adherent                 | Non adherent |            |                    |                            |
| Sex                  | Male                     | 87           | 55         | 0.80(0.51, 1.22)   | <b>0.48(0.28, 0.82)**</b>  |
|                      | Female                   | 161          | 81         | 1                  | 1                          |
| Residence            | Rural                    | 51           | 39         | 1                  |                            |
|                      | Urban                    | 197          | 97         | 1.55(0.96, 2.52)*  |                            |
| Marital Status       | Single                   | 13           | 4          | 1                  |                            |
|                      | Married                  | 157          | 76         | 0.64 (0.20, 2.02)* |                            |
|                      | Divorced                 | 22           | 19         | 0.36 (0.10, 1.28)* |                            |
|                      | Widowed                  | 56           | 37         | 0.47 (0.14, 1.52)* |                            |
| Religion             | Orthodox                 | 226          | 117        | 0.60(.31, 1.15)*   |                            |
|                      | Others                   | 22           | 19         | 1                  |                            |
| Educational Status   | Illiterate               | 119          | 77         | 1                  |                            |
|                      | Grade 1-6 <sup>th</sup>  | 39           | 21         | 1.20(0.66, 2.20)*  |                            |
|                      | Grade 7-12 <sup>th</sup> | 58           | 25         | 1.50(0.87, 2.60)*  |                            |
|                      | Diploma and above        | 32           | 13         | 1.59(0.79, 3.23)*  |                            |
| Income level         | <= 500 ETB               | 152          | 96         | 1                  |                            |
|                      | 501-100 ETB              | 39           | 26         | 0.95(0.54, 1.66)*  |                            |
|                      | >=1001 ETB               | 57           | 14         | 2.57(1.36, 4.87)*  |                            |
|                      | Government worker        | 56           | 18         | 1.80(0.90, 3.64)*  |                            |
| Employment Status    | Merchant                 | 54           | 39         | 0.8(0.43, 1.49)*   |                            |
|                      | Student                  | 6            | 2          | 1.74 (0.33, 9.19)* |                            |
|                      | House wife               | 57           | 30         | 1.10(0.58, 2.08)*  |                            |
|                      | Farmer                   | 25           | 18         | 0.81 (0.38, 1.72)* |                            |
|                      | Retired                  | 50           | 29         | 1                  |                            |
| No of co morbidities | None                     | 118          | 64         | 2.09 (0.98, 4.46)  | <b>2.50(1.01, 6.21)**</b>  |
|                      | One                      | 115          | 55         | 2.37 (1.10, 5.09)  | <b>2.68(1.07, 6.71)**</b>  |
|                      | Two and above            | 15           | 17         | 1                  | <b>1</b>                   |
| BP level             | Controlled               | 136          | 43         | 2.63 (1.69, 4.08)  | <b>2.93(1.73, 4.96)**</b>  |
|                      | Uncontrolled             | 112          | 93         | 1                  | <b>1</b>                   |
| Distance in Hrs      | <0.5 hrs                 | 112          | 39         | 2.05(1.31, 3.21)   | <b>2.02(1.19, 3.43)**</b>  |
|                      | ≥0.5 hrs                 | 136          | 97         | 1                  | <b>1</b>                   |
| Dosage Frequency     | Once daily               | 123          | 56         | 1.10 (0.27, 4.55)* |                            |
|                      | BID                      | 119          | 77         | 0.77 (0.19, 3.18)* |                            |
|                      | TID and above            | 6            | 3          | 1                  |                            |
| Knowledge towards    | Knowledgeable            | 224          | 71         | 8.55 (4.99, 14.65) | <b>6.21(3.22, 11.97)**</b> |

|                          |                   |     |     |                    |                           |
|--------------------------|-------------------|-----|-----|--------------------|---------------------------|
| HTN and its treatment    | Not Knowledgeable | 24  | 65  | 1                  | <b>1</b>                  |
| Attitude                 | Favourable        | 236 | 96  | 8.19 (4.12, 16.29) | <b>3.23(1.31, 7.97)**</b> |
|                          | Not favourable    | 12  | 40  | 1                  | <b>1</b>                  |
| Pt-provider relationship | Good              | 239 | 124 | 2.57( 1.05, 6.27)* |                           |
|                          | Poor              | 9   | 12  | 1                  |                           |

---

Note: - \*\* statistically significant \* variables with p value of greater than 0.2 in crude analysis omitted from entering in to the model.
